# Supplementary material for: First diastereoselective synthesis of methyl caffeoyl- and feruloyl-muco-quinates
Source: Royal Society of Chemistry journal article supplement (doi:10.1039/c2ob25124h), 2012-01-01

# First diastereoselective synthesis of methyl caffeoyl- and feruloyl-*muco*-quinates

Rakesh Jaiswal, Michael H. Dickman and Nikolai Kuhnert\*

## Supplementary information

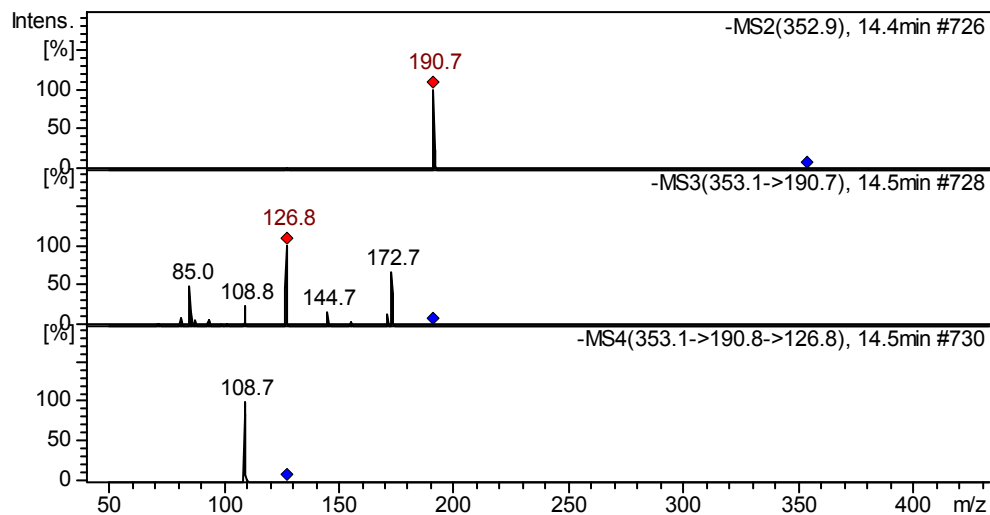

Figure 1: MS<sup>4</sup> Spectra of *muco*-3-CQA.

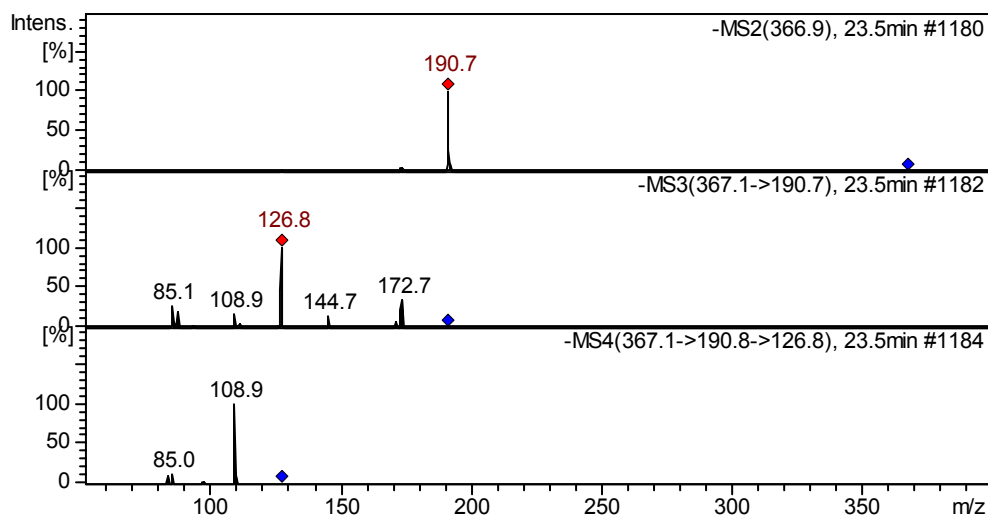

**Figure 2:** MS<sup>4</sup> Spectra of *muco*-3-FQA.

### Synthesis of 3-caffeoyl-*muco*-quinic acid and 3-feruloyl-*muco*-quinic acid 30 and 31

**Synthesis of methyl 3-*O*-(4-*O*-allyl)-feruloyl-TMB-*muco*-quinic acid.** To a solution of methyl TMB-*muco*-quinic acid (1 g, 3.12 mmol) and 4-(dimethyl amino)-pyridine (DMAP) (77 mg, 0.63 mmol) in DCM (50 mL) were added pyridine (10 mL) and acid chloride (4.68 mmol) at room temperature. The reaction mixture was refluxed for 24 h and acidified with a 1 M HCl solution to pH = 3. The layers were separated and the aqueous phase was extracted with DCM (3 x 50 mL). The combined organic layers were dried over Na<sub>2</sub>SO<sub>4</sub>, filtered and the solvent was removed in vacuo. The crude product was purified by column chromatography on silica gel (ethyl acetate/petroleum ether, 30-50%) to give methyl 3-*O*-(4-*O*-allyl)-feruloyl-TMB-*muco*-quinic acid as a pale yellow powder (1.60 g, 96%), mp 101-103 °C;  $\nu_{\max}/\text{cm}^{-1}$  (KBr) 3423br, 3080w, 2992, 2951, 1749s, 1713s, 1631vs, 1597vs, 1264s, 1139;  $\delta_{\text{H}}$  (CDCl<sub>3</sub>): 1.24 (3H, s, CH<sub>3</sub>), 1.26 (3H, s, CH<sub>3</sub>), 1.86 (1H, dd, *J* 13.0, 11.4, 6-*HH*), 1.89 (1H, ddd, *J* 12.5, 5, 2.2, 2-*HH*), 1.97 (1H, t, *J* 12.5, 6-*HH*), 2.25 (1H, ddd, *J* 12.8, 5.0, 2.3, 2-*HH*), 3.20 (3H, s, COCH<sub>3</sub>), 3.28 (3H, s, COCH<sub>3</sub>), 3.75 (1H, t, *J* 10.1, 4-H), 3.75 (3H, s, COOCH<sub>3</sub>), 3.87 (3H,

s, C<sub>Ar</sub>-OCH<sub>3</sub>), 4.09 (1H, ddd, *J* 11.4, 5.0, 1.8, 3-H), 4.60 (2H, d, *J* 2.3, C<sub>Ar</sub>-OCH<sub>2</sub>), 5.27 (2H, m, CHH=CH), 5.38 (1H, ddd, *J* 12.8, 2.5, 1.4, CHH=CH), 6.1 (1H, m, CH<sub>2</sub>=CH), 6.23 (1H, d, *J* 16.0, C<sub>Ar</sub>-CH=CH), 6.82 (1H, d, *J* 8.7, C<sub>Ar</sub>H), 7.04 (2H, m, C<sub>Ar</sub>H), 7.57 (1H, d, *J* 16.0, C<sub>Ar</sub>-CH); δ<sub>C</sub> (CDCl<sub>3</sub>): 17.7 (CH<sub>3</sub>), 17.8 (CH<sub>3</sub>), 37.5 (C-2), 38.9 (C-6), 47.8 (COCH<sub>3</sub>), 48.0 (COCH<sub>3</sub>), 53.2 (COOCH<sub>3</sub>), 56.0 (Ar-OCH<sub>3</sub>), 65.6 (C-3), 69.3 (C-5), 69.8 (C<sub>Ar</sub>-OCH<sub>2</sub>), 73.3 (C-4), 73.5 (C-1), 99.6 (COCH<sub>3</sub>), 99.7 (COCH<sub>3</sub>), 110.2 (C<sub>Ar</sub>), 112.9 (C<sub>Ar</sub>), 115.8 (CH-COO), 118.4 (CH<sub>2</sub>=CH), 122.5 (C<sub>Ar</sub>), 127.6 (C<sub>Ar</sub>-CH), 132.8 (CH<sub>2</sub>=CH), 144.9 (C<sub>Ar</sub>-CH), 149.6 (C<sub>Ar</sub>-OCH<sub>3</sub>), 150.2 (C<sub>Ar</sub>-OCH<sub>2</sub>), 166.3 (CH-COO), 175.2 (COOCH<sub>3</sub>); HRMS (ESI<sup>+</sup>): Exact mass calculated for C<sub>27</sub>H<sub>36</sub>O<sub>11</sub>Na [M+Na<sup>+</sup>]<sup>+</sup>, 559.2155. Found 559.2154.

**Synthesis of 3-*O*-feruloyl-*muco*-quinic acid (31).** To a solution of methyl 3-*O*-(4-*O*-allyl)-feruloyl-TMB-*muco*-quinic acid (537 mg, 1 mmol), and *p*-TsOH (20 mg, 0.105 mmol) in methanol-water (9:1, 30 mL) was added 10% Pd/C (195 mg) at room temperature. The reaction mixture was heated at 60 °C for 48 h, cooled to room temperature, filtered and methanol was removed in vacuo. Aqueous reaction mixture was extracted with ethyl acetate (3 x 50 mL). The combined organic layers were dried over Na<sub>2</sub>SO<sub>4</sub>, filtered and the solvent was removed in vacuo. The crude product was purified by column chromatography on silica gel (ethyl acetate/petroleum ether, 60-80%) to give methyl 3-*O*-feruloyl-TMB-*muco*-quinic acid pale yellow powder (471 mg, 95%). Methyl 3-*O*-feruloyl-TMB-*muco*-quinic acid (471 mg, 0.95 mmol) was dissolved in a TFA (90% aq. solution, 20 mL) at 0 °C and the solution was stirred for 5 h at room temperature. The solvents were removed in vacuo to afford the target compound which was analyzed by HPLC-MS.

**Synthesis of methyl 3-*O*-(3,4-di-*O*-allyl)-caffeoyl-TMB-*muco*-quinic acid.** To a solution of methyl TMB-*muco*-quinic acid (1 g, 3.12 mmol) and DMAP (77 mg, 0.63 mmol) in DCM (50 mL) were added pyridine (10 mL) and acid chloride **7** (1.30 g, 4.68 mmol) at room

temperature. The reaction mixture was refluxed for 36 h and acidified with a 1 M HCl solution to pH = 3. The layers were separated and the aqueous phase was extracted with DCM (3 x 50 mL). The combined organic layers were dried over Na<sub>2</sub>SO<sub>4</sub>, filtered and the solvent was removed in vacuo. The crude product was purified by column chromatography on silica gel (ethyl acetate/petroleum ether, 20-40%) to give methyl 3-*O*-(3,4-di-*O*-allyl)-caffeoyl-TMB-*muco*-quinic acid as a pale yellow powder (1.66 g, 95%), mp 82-84 °C;  $\nu_{\max}/\text{cm}^{-1}$  (KBr) 3423, 2951, 2992, 3080, 1749, 1713, 1631, 1597, 1511, 1264, 1139, 1076;  $\delta_{\text{H}}$  (CDCl<sub>3</sub>): 1.28 (6H, s, CH<sub>3</sub>), 1.85 (2H, m, 6-*HH*, 2-*HH*), 1.99 (1H, t, *J* 12.4, 6-*HH*), 2.23 (1H, m, 2-*HH*), 3.16 (1H, m, 2-*HH*), 3.24 (6H, s, COCH<sub>3</sub>), 3.31 (3H, s, COOCH<sub>3</sub>), 3.77 (1H, t, *J* 10, 4-*H*), 4.10 (1H, ddd, *J* 14.2, 12.3, 5, 3-*H*), 4.6 (4H, m, C<sub>Ar</sub>-OCH<sub>2</sub>), 5.29 (2H, d, *J* 9.62, CHH=CH), 5.43 (2H, d, *J* 16.9, CHH=CH), 6.06 (2H, m, CH<sub>2</sub>=CH), 6.21 (1H, d, *J* 16, C<sub>Ar</sub>-CH=CH), 6.85 (1H, d, *J* 8.7, C<sub>Ar</sub>H), 7.04 (2H, m, C<sub>Ar</sub>H), 7.56 (1H, d, *J* 16, C<sub>Ar</sub>-CH);  $\delta_{\text{C}}$  (CDCl<sub>3</sub>): 17.7 (CH<sub>3</sub>), 17.8 (CH<sub>3</sub>), 37.5 (C-2), 38.7 (C-6), 47.7 (COCH<sub>3</sub>), 47.9 (COCH<sub>3</sub>), 53.2 (COOCH<sub>3</sub>), 65.5 (C-3), 69.2 (C-5), 69.7 (C<sub>Ar</sub>-OCH<sub>2</sub>), 70.0 (C<sub>Ar</sub>-OCH<sub>2</sub>), 73.2 (C-4), 73.46 (C-1), 99.6 (COCH<sub>3</sub>), 99.9 (COCH<sub>3</sub>), 112.9 (C<sub>Ar</sub>), 113.5 (C<sub>Ar</sub>), 115.9 (CH-COO), 117.9 (CH<sub>2</sub>=CH), 117.9 (CH<sub>2</sub>=CH), 122.4 (C<sub>Ar</sub>), 127.6 (C<sub>Ar</sub>-CH), 132.9 (CH<sub>2</sub>=CH), 133.2 (CH<sub>2</sub>=CH), 144.8 (C<sub>Ar</sub>-CH), 148.6 (C<sub>Ar</sub>-OCH<sub>2</sub>), 150.7 (C<sub>Ar</sub>-OCH<sub>2</sub>), 166.2 (CH-COO), 175.3 (COOCH<sub>3</sub>); HRMS (ESI<sup>+</sup>): Exact mass calculated for C<sub>29</sub>H<sub>38</sub>O<sub>11</sub>Na [M+Na<sup>+</sup>]<sup>+</sup>, 585.2155. Found 559.2154.

**Synthesis of 3-*O*-caffeoyl-*muco*-quinic acid (30).** To a solution of methyl 3-*O*-(3,4-di-*O*-allyl)-caffeoyl-TMB-*muco*-quinic acid (562 mg, 1 mmol), and *p*-TsOH (40 mg, 0.21 mmol) in methanol-water (9:1, 30 mL) was added 10% Pd/C (390 mg) at room temperature. The reaction mixture was heated at 60 °C for 48 h, cooled to room temperature, filtered and methanol was removed in vacuo. The aqueous reaction mixture was extracted with ethyl acetate (3 x 50 mL). The combined organic layers were dried over Na<sub>2</sub>SO<sub>4</sub>, filtered and the solvent was removed in vacuo. The crude product was purified by column chromatography on silica gel (ethyl acetate/petroleum ether, 60-90%) to give methyl 3-*O*-caffeoyl-TMB-*muco*-

quinate as a pale yellow powder (461 mg, 93%). Methyl 3-*O*-caffeoyl-TMB-*muco*-quinate (461 mg, 0.93 mmol) was dissolved in a TFA solution (90% aq. solution, 20 mL) at 0 °C and the solution was stirred for 5 h at room temperature. The solvents were removed in vacuo to afford the target compound which was analyzed by HPLC-MS

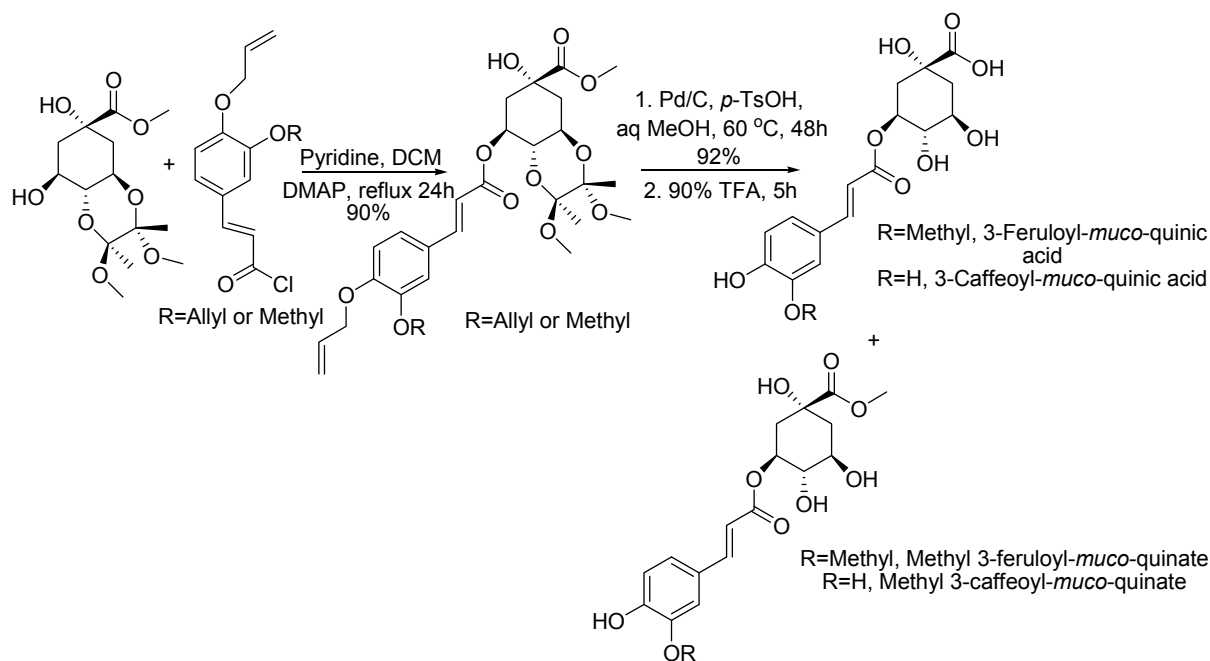

Supplement: c2ob25124h.pdf [file c2ob25124h.pdf]
